# Supplementary material for: A meteorological–hydrological regional ensemble forecast for an early-warning system over small Apennine catchments in Central Italy
Source: Copernicus journal article supplement (doi:10.5194/hess-24-3135-2020), 2020-06-19
Supplement: Supplementary file 1 [file hess-24-3135-2020-supplement.zip]

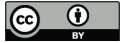

## *Supplement of*

# **A meteorological–hydrological regional ensemble forecast for an early-warning system over small Apennine catchments in Central Italy**

**Rossella Ferretti et al.**

*Correspondence to:* Rossella Ferretti ([rossella.ferretti@aquila.infn.it](mailto:rossella.ferretti@aquila.infn.it))

- `hess-24-3135-2020-supplement-title-page.pdf`
- `FigS1.png`
- `__MACOSX`
  - `._FigS1.png`

The copyright of individual parts of the supplement might differ from the CC BY 4.0 License.
